# Supplementary material
Source: PubMed Central journal article supplement (PMC8104023)
Supplement: Supp_Data.pdf [file Supp_Data.pdf]

# Supplementary Data

Date \_\_\_\_\_

ID \_\_\_\_\_

## GOAL PROCESSING QUESTIONNAIRE

Please rate how you feel your abilities in each of these areas have changed since starting the training, compared to prior to start of the training. Please rate your abilities using the scale provided.

Add any additional comments that you think would help us better understand your rating.

1. Your ability to take a complex task and divide it into more manageable subtasks?

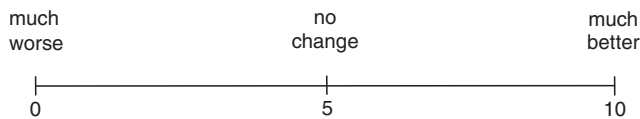

6. Your ability to recognize when you are distressed or overwhelmed.

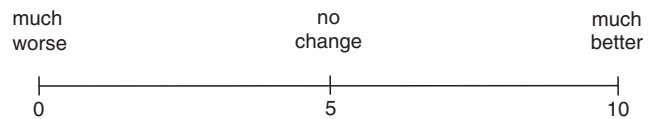

2. Your ability to prioritize when you are faced with multiple or complex tasks?

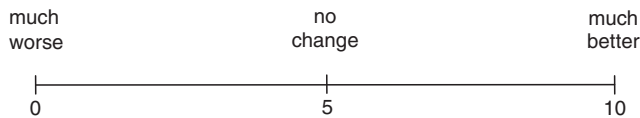

7. Your ability to stop and relax during stressful times?

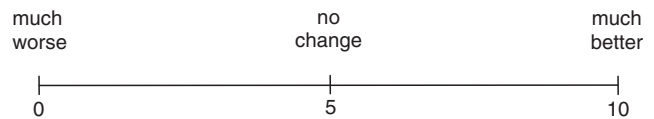

3. Your ability to choose feasible daily goals to accomplish?

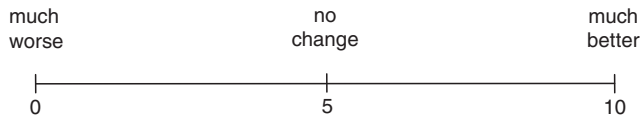

8. Your ability to notice when you make a mistake?

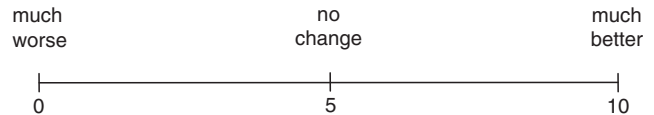

4. Your ability to start working on a task?

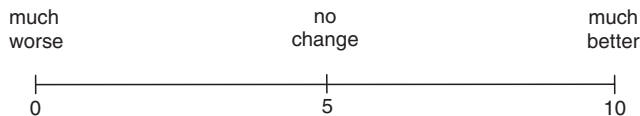

9. Your ability to correct a mistake you noticed?

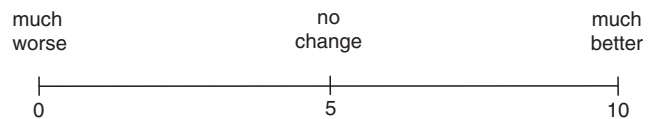

5. Your ability to stop during the task and check if you are on track?

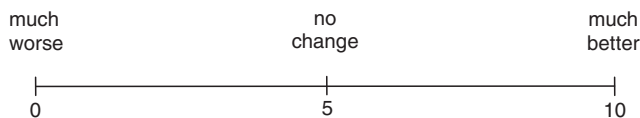

10. Your ability to hold and maintain important information in mind in a quiet environment?

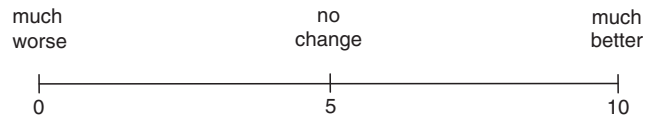

11. Your ability to hold important information in mind in a distracting environment (e.g. a noisy place).

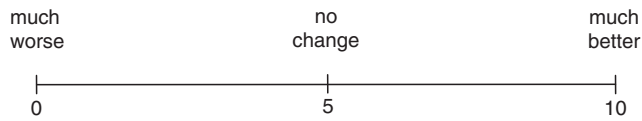

12. Your ability to ignore sounds, noise or other things going on around you, while working on a task?

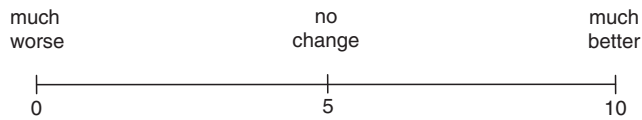

13. Your ability to keep track of different parts of the task?

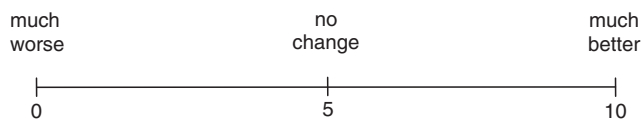

14. Your ability to do a series of tasks in the most efficient order?

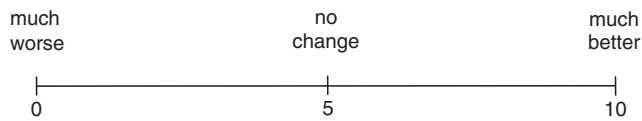

15. Your ability to think of alternate solutions if things do not go as planned?

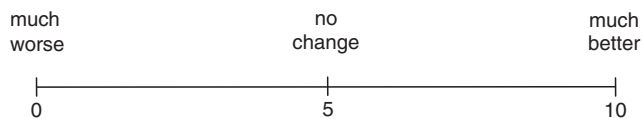

16. Your ability to follow the outlined plan, and not get side-tracked?

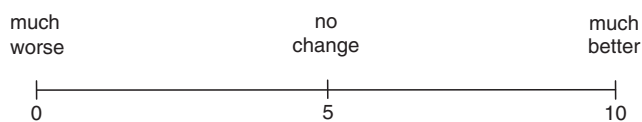

17. Your ability to get back on track if you are distracted from a task.

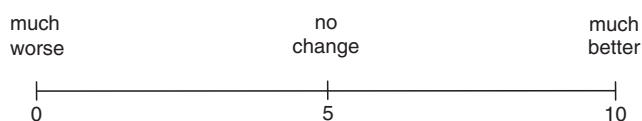

18. Your ability to finish something that you have started?

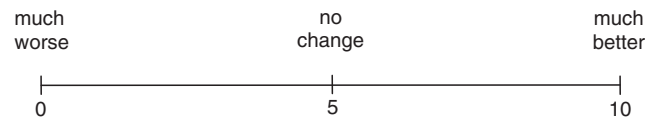

19. Your ability to finish all the tasks that you need to on a given day.

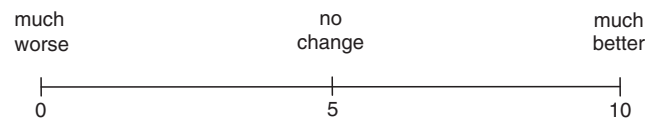

20. Your ability to manage time it takes to complete tasks?

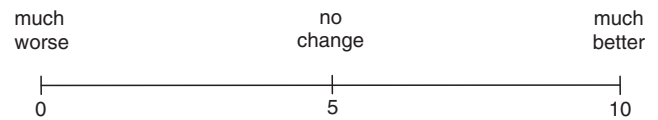

21. Your ability recall strategies that have been helpful in the past with similar tasks?

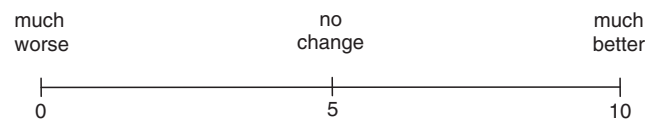

22. Your ability to avoid making similar mistakes repeatedly?

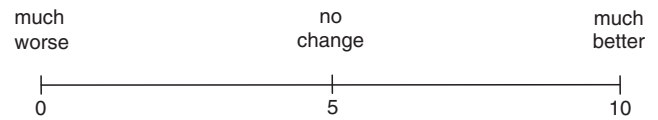

23. Your ability to accurately estimate how well you'll do on a task prior to starting it?

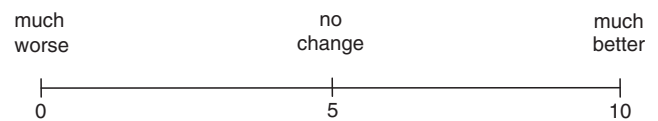

24. Your ability to manage your energy?

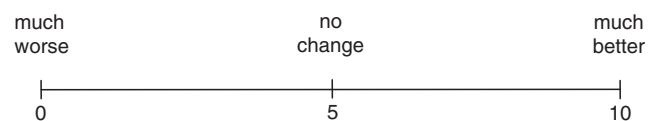

25. Your ability to recognize when you are too tired to perform well.

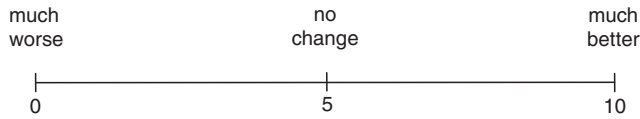

28. Your level of anxiety

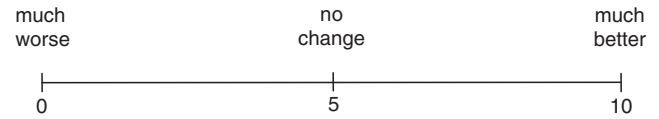

26. How tired you get when doing tasks that require thinking and problem-solving?

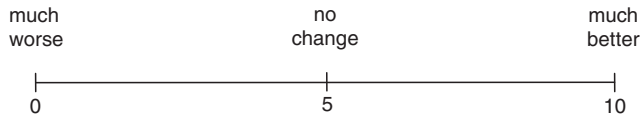

29. Your ability to fall asleep at bedtime.

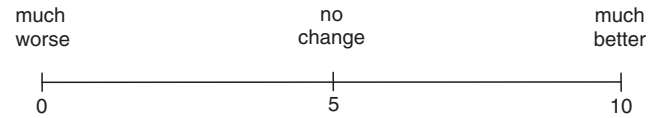

27. Your ability to interact with others in a social setting or group

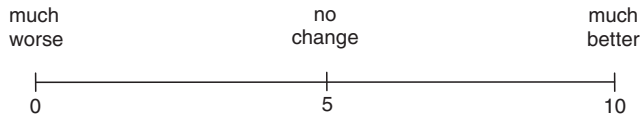

30. Do you feel well-rested after a night's sleep?

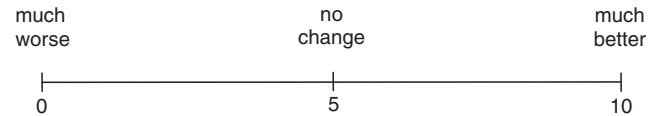

#### SCORING

| Domain                        | Item(s)                |
|-------------------------------|------------------------|
| Planning                      | Average of items 1–3   |
| Initiation                    | Item 4                 |
| Self-monitoring               | Average of items 5–9   |
| Attention/working memory      | Average of items 10–12 |
| Sequencing                    | Average of items 13–14 |
| Divergent Thinking            | Item 15                |
| Execution                     | Average of items 16–20 |
| Learning from Past Experience | Average of items 21–22 |
| Awareness                     | Item 23                |
| Fatigue/Energy Management     | Average of items 24–26 |
| Social Interaction            | Item 27                |
| Anxiety                       | Item 28                |
| Sleep                         | Average of items 29–30 |

SUPPLEMENTARY TABLE 1. EFFECTS OF TRAINING (GOALS VS. BHE) ON INDIVIDUAL NEUROPSYCHOLOGICAL MEASURES

|                                              | <i>Pre-training</i> |           |            |           | <i>Post-training</i> |           |            |           | <i>Time</i> | <i>Partial <math>\eta^2</math></i> | <i>Group <math>\times</math> time</i> | <i>Partial <math>\eta^2</math></i> |
|----------------------------------------------|---------------------|-----------|------------|-----------|----------------------|-----------|------------|-----------|-------------|------------------------------------|---------------------------------------|------------------------------------|
|                                              | <i>GOALS</i>        |           | <i>BHE</i> |           | <i>GOALS</i>         |           | <i>BHE</i> |           |             |                                    |                                       |                                    |
|                                              | <i>M</i>            | <i>SD</i> | <i>M</i>   | <i>SD</i> | <i>M</i>             | <i>SD</i> | <i>M</i>   | <i>SD</i> |             |                                    |                                       |                                    |
| <b>Attention and Executive Function</b>      |                     |           |            |           |                      |           |            |           |             |                                    |                                       |                                    |
| <b>Working Memory</b>                        |                     |           |            |           |                      |           |            |           |             |                                    |                                       |                                    |
| WAIS-III LNS                                 | 0.46                | 0.99      | -0.17      | 0.99      | 0.69                 | 0.85      | -0.38      | 0.95      | 0.01        | 0.00                               | 2.36                                  | 0.07                               |
| ACT 9                                        | -0.64               | 1.32      | -0.30      | 1.22      | 0.08                 | 0.85      | -0.31      | 1.32      | 4.48*       | 0.13                               | 4.91* <sup>1</sup>                    | 0.14                               |
| ACT 18                                       | -0.74               | 1.01      | -0.44      | 1.20      | -0.74                | 1.12      | -1.19      | 1.70      | 4.22*       | 0.12                               | 4.09                                  | 0.12                               |
| ACT 36                                       | -0.58               | 1.15      | -0.52      | 1.28      | -0.36                | 1.18      | -0.37      | 1.46      | 1.00        | 0.03                               | 0.03                                  | 0.00                               |
| <b>Sustained Attention</b>                   |                     |           |            |           |                      |           |            |           |             |                                    |                                       |                                    |
| DVT Time                                     | -0.57               | 1.36      | -0.84      | 1.11      | -0.37                | 1.14      | -0.46      | 1.05      | 7.21*       | 0.19                               | 0.66                                  | 0.02                               |
| DVT Errors                                   | -0.47               | 0.85      | -0.06      | 1.36      | -0.43                | 0.74      | -0.28      | 1.25      | 0.51        | 0.02                               | 1.21                                  | 0.04                               |
| <b>Mental Flexibility</b>                    |                     |           |            |           |                      |           |            |           |             |                                    |                                       |                                    |
| <sup>2</sup> DF Switching                    | 0.17                | 0.76      | 0.23       | 0.48      | 0.49                 | 0.60      | 0.12       | 1.03      | 0.64        | 0.02                               | 2.45                                  | 0.08                               |
| <sup>2</sup> VF Switching                    | -0.37               | 1.41      | -0.30      | 1.64      | 0.23                 | 1.05      | -0.21      | 1.54      | 2.77        | 0.09                               | 1.45                                  | 0.05                               |
| TMT B                                        | -0.25               | 0.98      | -0.54      | 0.67      | 0.05                 | 0.87      | -0.39      | 1.03      | 2.68        | 0.11                               | 0.33                                  | 0.01                               |
| <sup>2</sup> CWI Inhibition / Switching Time | -0.37               | 1.12      | -1.00      | 1.25      | -0.24                | 0.95      | -0.62      | 1.03      | 5.25*       | 0.15                               | 1.26                                  | 0.04                               |
| <sup>2</sup> CWI Inhibition/Switching Errors | 0.05                | 0.72      | -0.23      | 1.05      | 0.21                 | 0.49      | 0.16       | 0.57      | 4.89*       | 0.14                               | 0.84                                  | 0.03                               |
| <b>Inhibition</b>                            |                     |           |            |           |                      |           |            |           |             |                                    |                                       |                                    |
| <sup>2</sup> CWI Inhibition Time             | -0.28               | 1.13      | -0.41      | 0.93      | 0.09                 | 0.97      | -0.69      | 1.18      | 0.15        | 0.01                               | 9.59** <sup>1</sup>                   | 0.24                               |
| <sup>2</sup> CWI Inhibition Errors           | -0.19               | 0.97      | -0.34      | 1.07      | -0.08                | 0.90      | -0.17      | 1.00      | 1.15        | 0.04                               | 0.05                                  | 0.00                               |
| <b>Memory</b>                                |                     |           |            |           |                      |           |            |           |             |                                    |                                       |                                    |
| <b>Learning</b>                              |                     |           |            |           |                      |           |            |           |             |                                    |                                       |                                    |
| HVLT Total Recall                            | -1.10               | 1.27      | -1.40      | 1.13      | -0.52                | 1.40      | -0.92      | 1.35      | 5.06*       | 0.14                               | 0.04                                  | 0.00                               |
| BVMT Total Recall                            | 0.19                | 1.15      | -0.51      | 1.43      | 0.02                 | 1.30      | -0.65      | 1.53      | 1.31        | 0.04                               | 0.02                                  | 0.00                               |
| <b>Delayed Recall</b>                        |                     |           |            |           |                      |           |            |           |             |                                    |                                       |                                    |
| HVLT Delayed Rec.                            | -1.30               | 1.43      | -1.23      | 1.16      | -0.53                | 1.42      | -0.58      | 1.37      | 8.87**      | 0.23                               | 0.06                                  | 0.00                               |
| BVMT Delayed Rec.                            | -0.24               | 1.28      | -0.47      | 1.19      | 0.17                 | 1.29      | -0.80      | 1.44      | 0.07        | 0.00                               | 5.21* <sup>1</sup>                    | 0.15                               |

\*Significant at the  $p < 0.05$  level.

\*\*Significant at the  $p < 0.01$  level.

<sup>1</sup>Participants in GOALS group improved significantly more from pre- to post-training, compared with BHE.

<sup>2</sup>Subtests from the Delis-Kaplan Executive Function System (DKEFS).

GOALS, Goal-Oriented Attentional Self-Regulation; BHE, Brain-Health Education; M, mean; SD, standard deviation; WAIS-III, Wechsler Adult Intelligence Scale, 3rd Edition; LNS, Letter Number Sequencing; ACT, Auditory Consonant Trigrams; DVT, Digit Vigilance Test; DF, Design Fluency; VF, Verbal Fluency; TMT B, AUTH; CWI, Color Word Interference; HVLT, Hopkins Verbal Learning Test; BVMT, Brief Visuospatial Memory Test.
